# Supplementary material for: Sulfide organic polymers as novel and efficient metal-free heterogeneous Lewis acid catalysts for esterification reactions
Source: Royal Society of Chemistry journal article supplement (doi:10.1039/d2qm01127a), 2023-01-01
Supplement: d2qm01127a1.pdf [file d2qm01127a1.pdf]

Supporting Information

**Sulfide Organic Polymers as novel and efficient metal-free  
heterogeneous Lewis acid catalysts for esterification reactions**

M. Melero, U. Díaz\*, F.X. Llabrés i Xamena\*

Instituto de Tecnología Química, Universitat Politècnica de València, Consejo Superior de  
Investigaciones Científicas, 46022 Valencia, Spain.

E-mail: [udiaz@itq.upv.es](mailto:udiaz@itq.upv.es), [flabres@itq.upv.es](mailto:flabres@itq.upv.es)

## Contents

### *Characterization data*

|                                                                                 |   |
|---------------------------------------------------------------------------------|---|
| FT-IR spectroscopic data of SOP-type materials                                  | 3 |
| Solid-state CP-MAS <sup>13</sup> C NMR spectroscopic data of SOP-type materials | 4 |
| Elemental analysis of SOP-type materials                                        | 5 |
| Stability analysis after catalytic uses                                         | 5 |
| Potentiometric acid base titration curves of SOP-type materials                 | 6 |
| FT-IR spectroscopic data of SOP-type materials after adsorption of butyric acid | 6 |

## FT-IR spectroscopic data of SOP-type materials

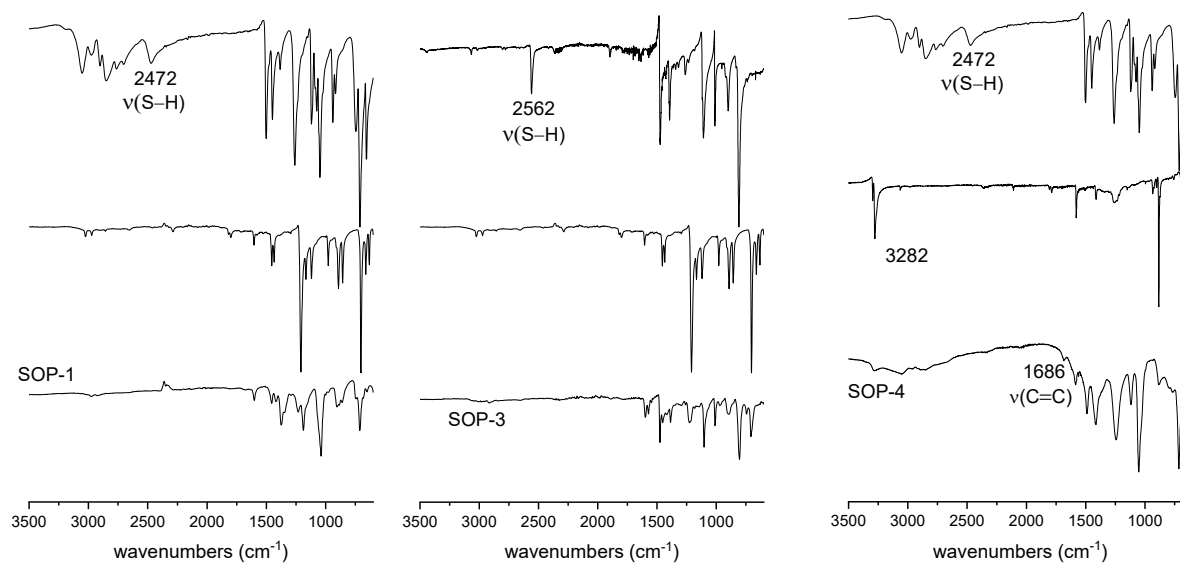

Figure S1. FTIR spectra of SOP-1, SOP-3 and SOP-4.

## Solid-state CP-MAS $^{13}\text{C}$ NMR spectroscopic data of SOP-type materials

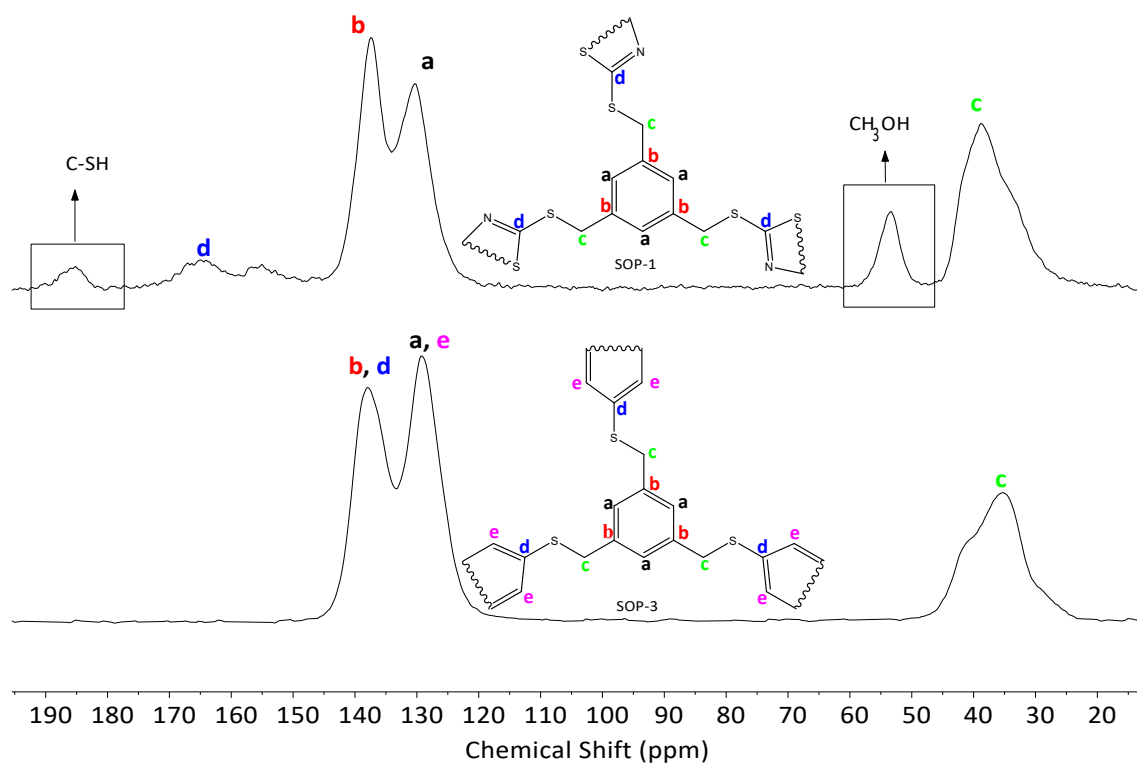

Figure S2. Solid-state CP-MAS  $^{13}\text{C}$  NMR spectroscopy of SOP-1 and SOP-3.

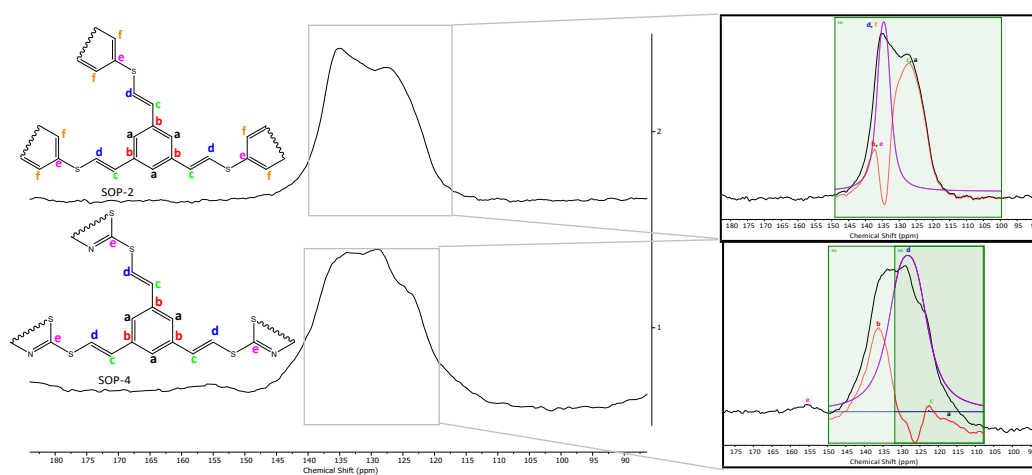

Figure S3. Solid-state CP-MAS  $^{13}\text{C}$  NMR spectra of SOP-2 and SOP-4.

## Elemental analysis of SOP-type materials

Table S1. Elemental analysis of SOP-1 and recovered SOP-1 after reaction.

| Catalyst        | C (wt%) | S(wt%) | N(wt%) | H(wt%) |
|-----------------|---------|--------|--------|--------|
| SOP-1           | 41.0    | 37.7   | 10.9   | 2.6    |
| Recovered SOP-1 | 43.7    | 37.5   | 10.8   | 2.9    |

## Stability analysis after catalytic uses

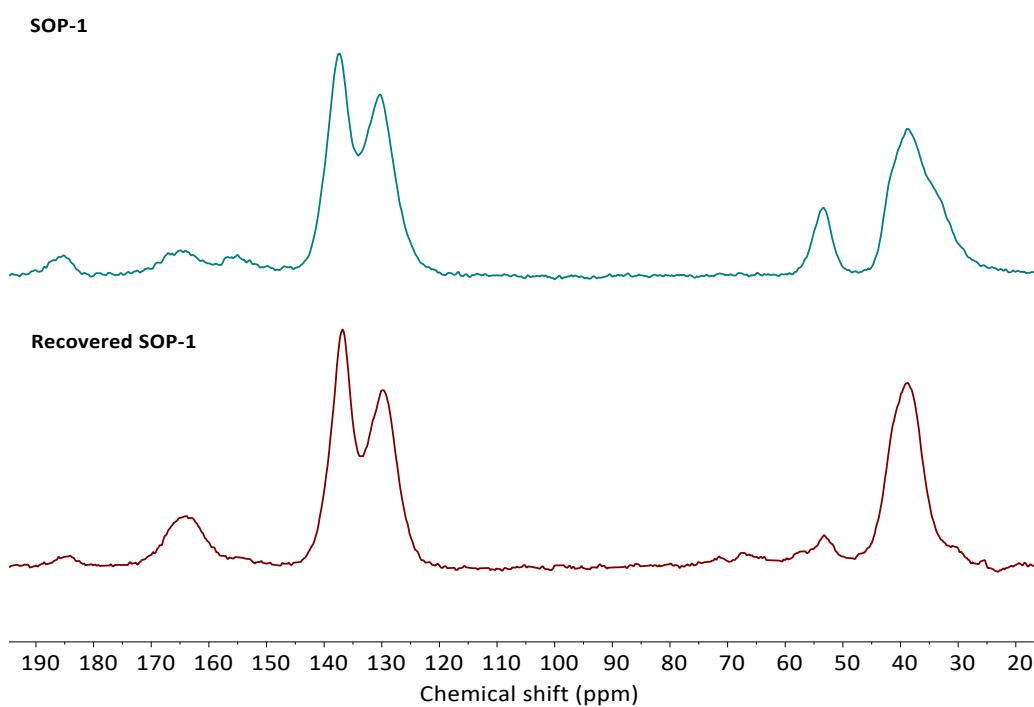

Figure S4. Solid-state CP-MAS <sup>13</sup>C NMR spectra of as-synthesized SOP-1 and recovered SOP-1 after reaction.

## Potentiometric acid base titration curves of SOP-type materials

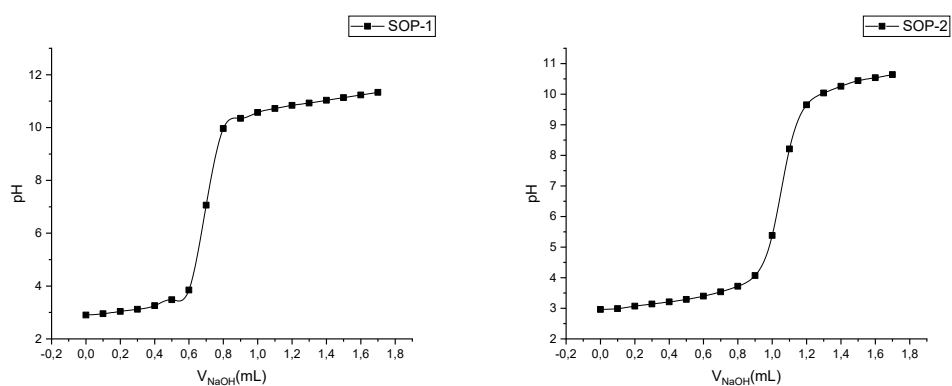

Figure S5. Potentiometric acid base titration experiments of SOP-1 and SOP-2.

## FT-IR spectroscopic data of SOP-type materials after adsorption of butyric acid

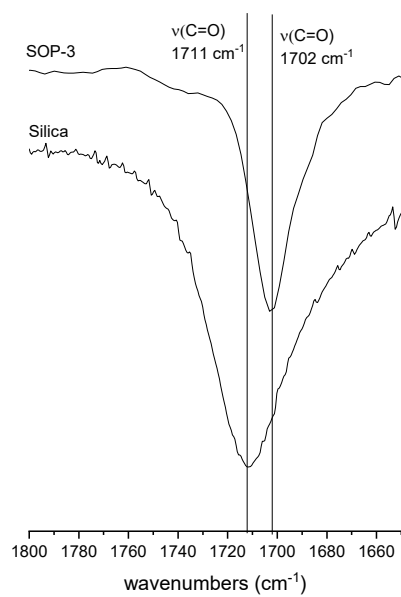

Figure S6. FTIR spectra of butyric acid supported ion SOP-3 and silica.
